# Supplementary material for: Soy and Breast Cancer: Focus on Angiogenesis
Source: PubMed Central journal article supplement (PMC4463727; doi:10.3390/ijms160511728), 2015-05-22
Supplement: ijms-16-11728-s001.pdf [file ijms-16-11728-s001.pdf]

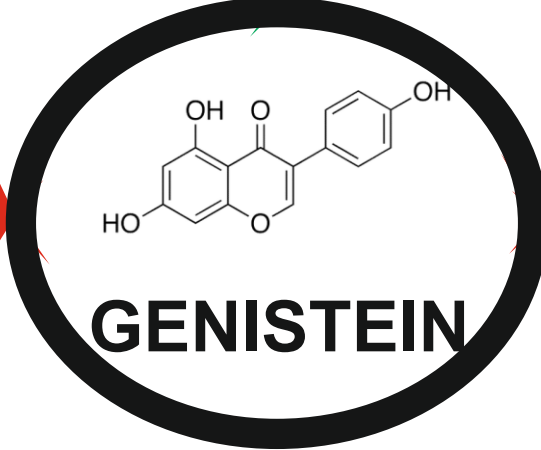

# GENISTEIN

- MMP-1,-2,-3 ↓
- VEGF ↓
- VEGFR1 ↓
- COX-2 ↓
- VE-cadherin ↓
- Integrin αV ↓
- Connexin 43 ↓
- Multimerin ↓
- uPA ↓
- JNK ↓
- p38 ↓
- Galectins ?

**EC**

- Endostatin ↑
- Angiostatin ↑
- Trombospondin ↑
- Galectin-3 ↑

**CC**

- VEGF ↓
- HIF ↓
- microvessel density ↓
- PDGF ↓
- TF ↓
- uPA ↓
- MMP-2,-3,-9,-13,-15 ↓
- EGF ↓
- IGF ↓
- Cadherin V ↓
- Angiopoietin-2 ↓
- HGF ↓
- Fibronectin ↓
- NF-κB ↓
- ERK/PI3K/AKT ↓
- MAPKAPK2 ↓
- Galectin-1 ↓

**CC**

— DECREASE OF ACTIVITY/EXPRESSION/SECRETION  
 — INCREASE OF ACTIVITY/EXPRESSION/SECRETION
